# Errata

Ballani P, Tran MT, Navar MD, Davidson MB: Clinical experience with U-500 regular insulin in obese, markedly insulin-resistant type 2 diabetic patients. *Diabetes Care* 29:2504–2505, 2006

A typographical error appears in Fig. 1 of the above-listed article. In the lower left box, “any explained hypoglycemia” should read “any unexplained hypoglycemia.”

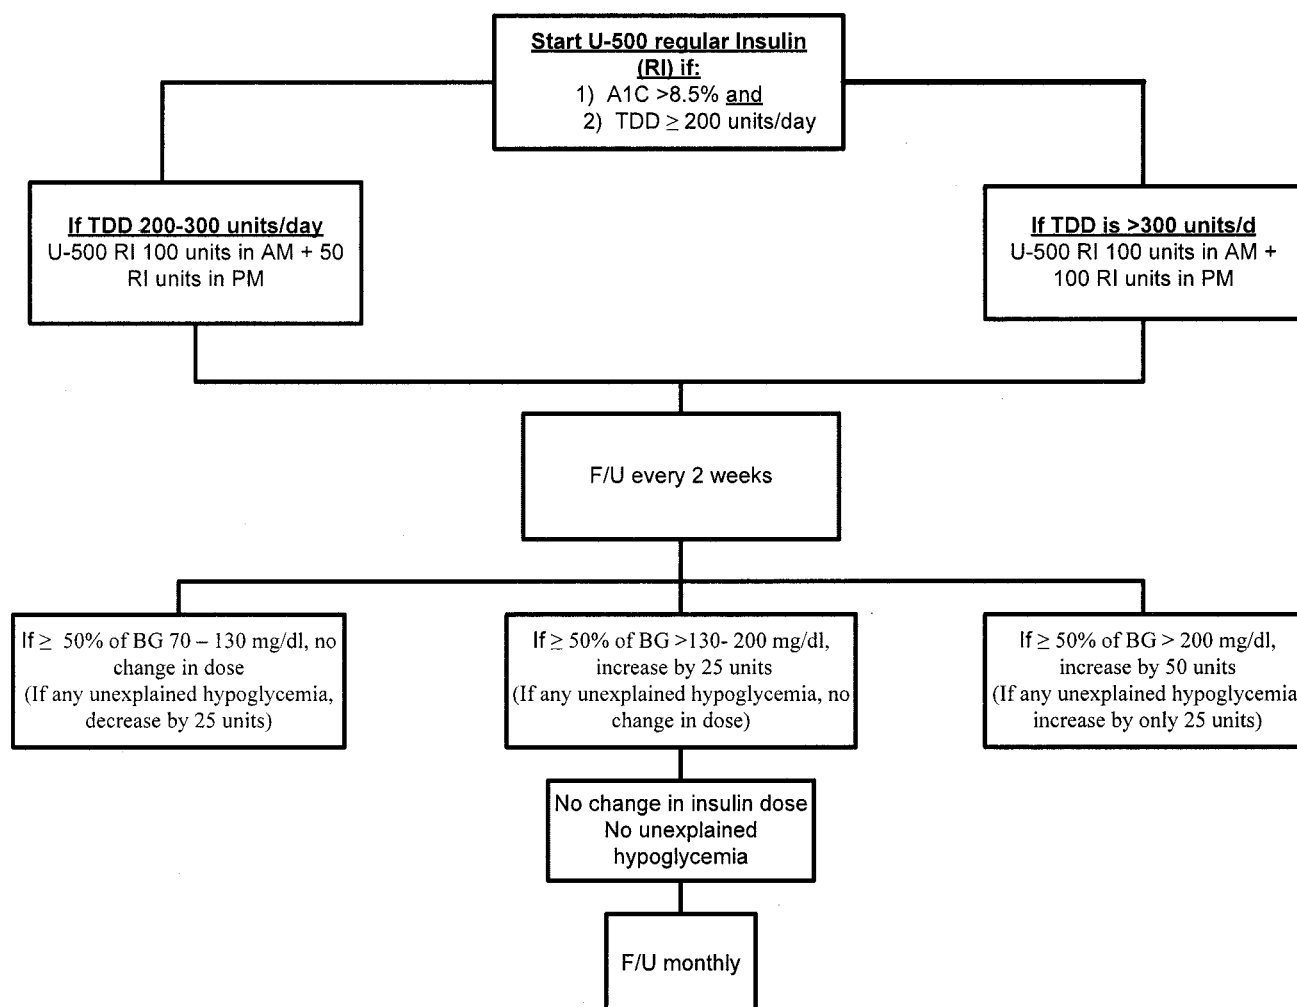

Samaras K, Wand H, Law M, Emery S, Cooper D, Carr A: Prevalence of metabolic syndrome in HIV-infected patients receiving highly active antiretroviral therapy using International Diabetes Foundation and Adult Treatment Panel III criteria: associations with insulin resistance, disturbed body fat compartmentalization, elevated C-reactive protein, and hypoadiponectinemia. *Diabetes Care* 30:113–119, 2007

In the above-listed article, a typographical error occurred in the title. The correct citation appears above, and the online version reflects the change.

Malecki MT, Skupien J, Klupa T, Wanic K, Mlynarski W, Gach A, Solecka I, Sieradzki J: Transfer to sulphonylurea therapy in adult subjects with permanent neonatal diabetes due to *KCNJ11*-activating mutations: evidence for improvement in insulin sensitivity. *Diabetes Care* 30:147–149, 2007

In the above-listed article, a typographical error occurred in the title. The correct citation appears above, and the online version reflects the change.
